# Supplementary material for: A new motor synergy that serves the needs of oculomotor and eye lid systems while keeping the downtime of vision minimal
Source: eLife journal article supplement (doi:10.7554/elife.16290), 2016-08-22

The amplitude of the blink associated torsional shift (darkness I) correlates with the pre-torsional eye position

A

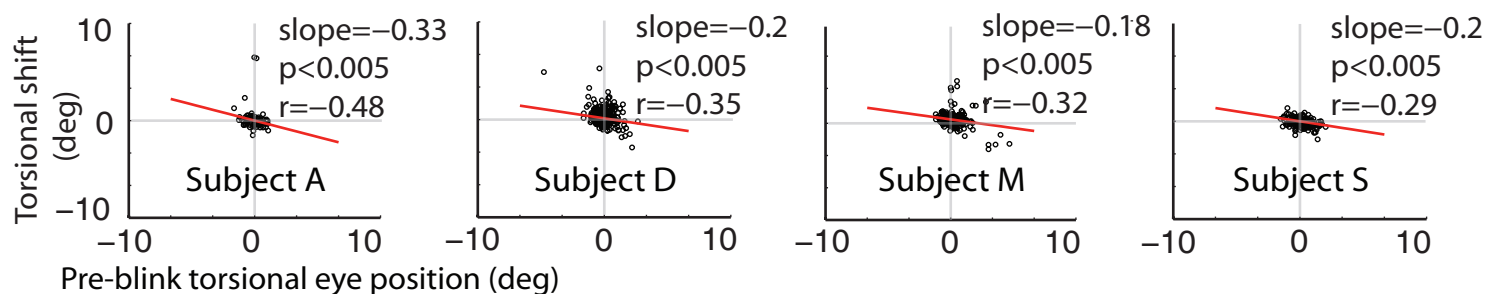

The amplitude of the blink associated torsional shift (darkness II) correlates with the pre-torsional eye position

B

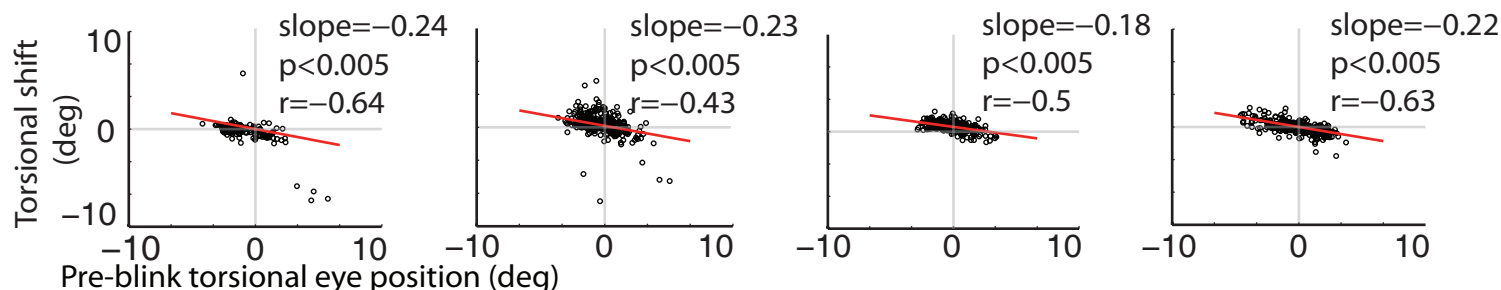

The amplitude of the blink associated torsional shift (Optic flow I, II) correlates with the pre-torsional eye position

C

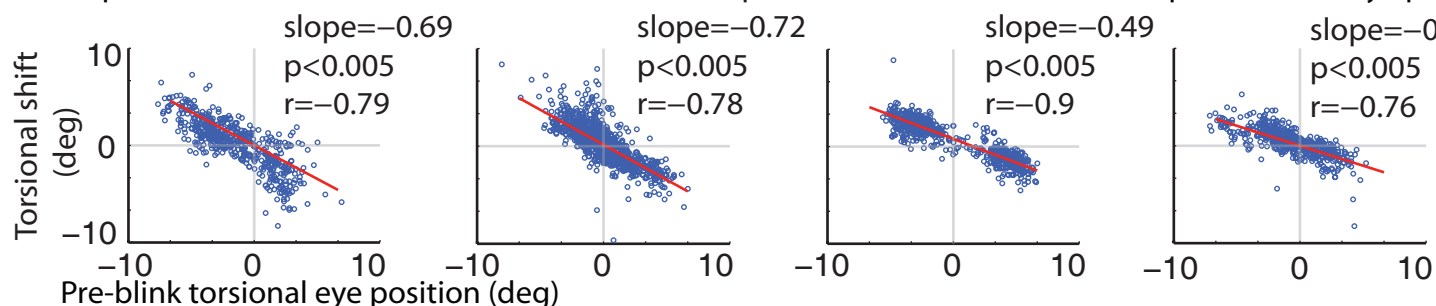

The amplitude of fast phase tOKN (Optic flow I, II) correlates inconsistently with pre-torsional eye position

D

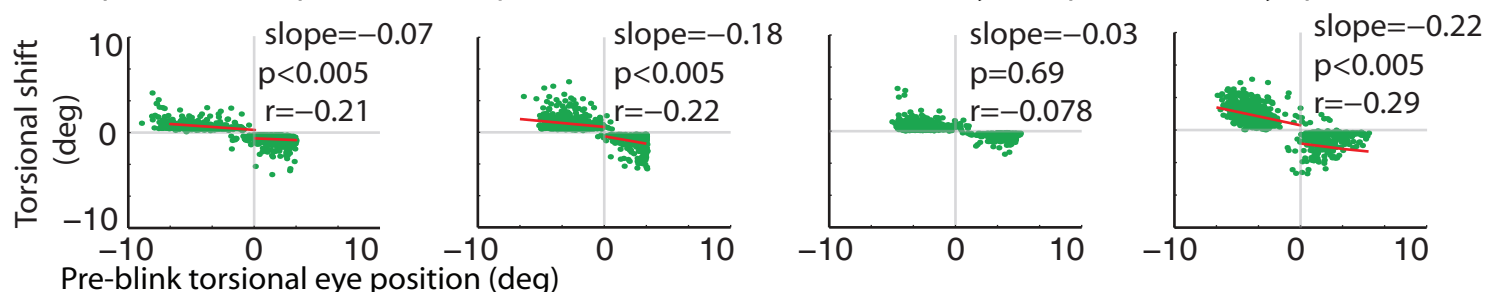

The amplitude of the blink associated torsional shift (Optic flow I, II) is not correlated with the pre-slow phase tOKN

E

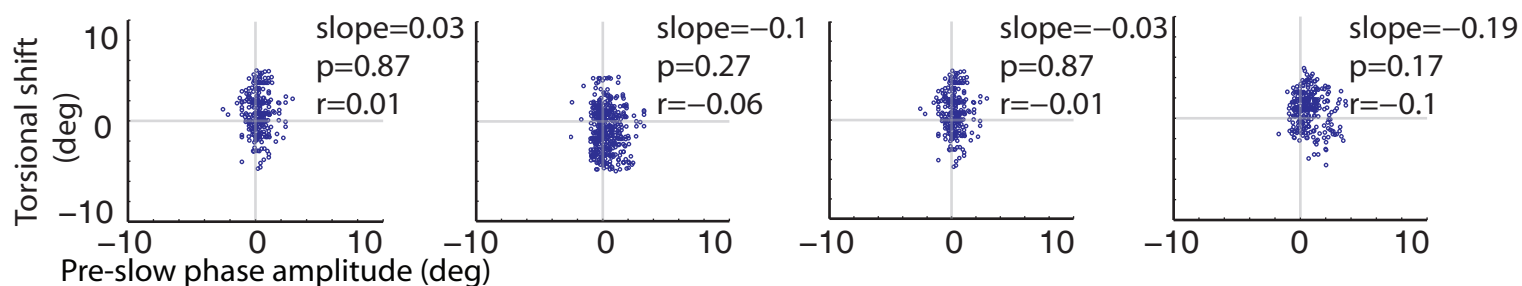

The amplitude of fast phase tOKN (Optic flow I, II) correlates with the pre-slow phase tOKN amplitude

F

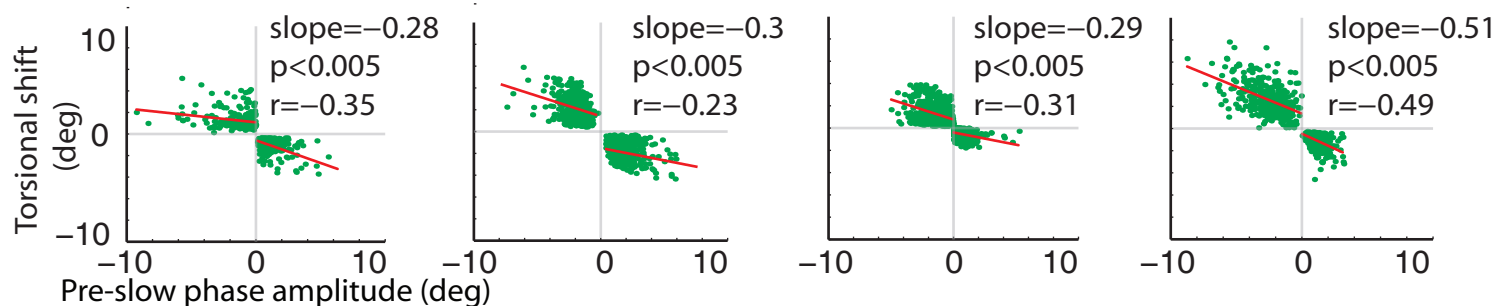

Supplement: supp [file elife-16290-supp-v2.zip]
