# Supplementary material for: A new motor synergy that serves the needs of oculomotor and eye lid systems while keeping the downtime of vision minimal
Source: eLife journal article supplement (doi:10.7554/elife.16290), 2016-08-22

The amplitude of the (**spontaneous**) blink associated torsional shift in (Optic flow I ,II) vs duration

A

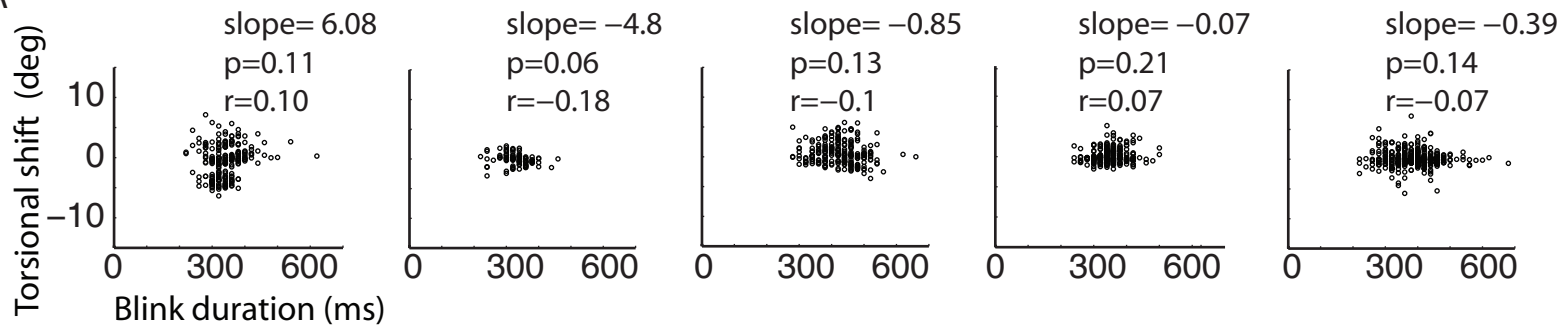

The amplitude of the (**simulated**) blink associated torsional shift in (Optic flow I ,II) vs duration

B

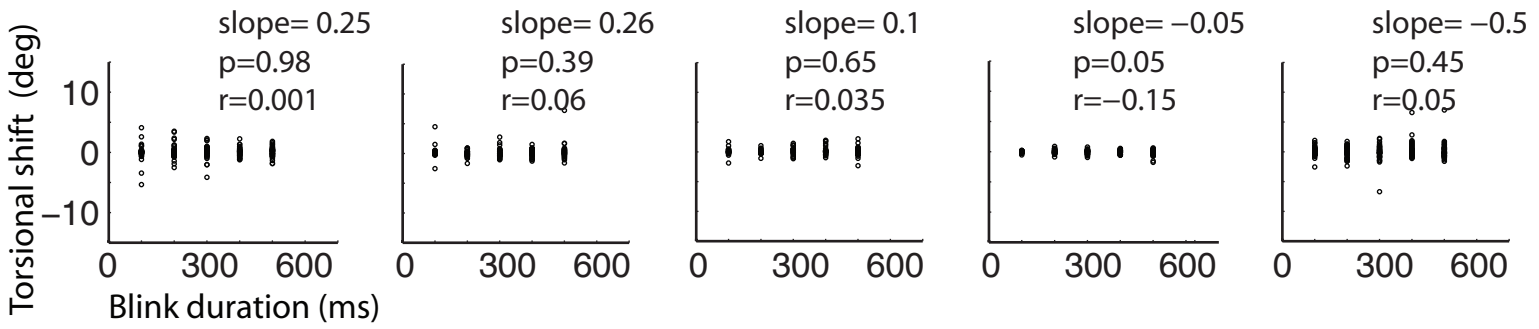

Supplement: supp [file elife-16290-supp-v2.zip]
