# Supplementary figures and images for: A new motor synergy that serves the needs of oculomotor and eye lid systems while keeping the downtime of vision minimal
Source: eLife journal article supplement (doi:10.7554/elife.16290), 2016-08-22

A

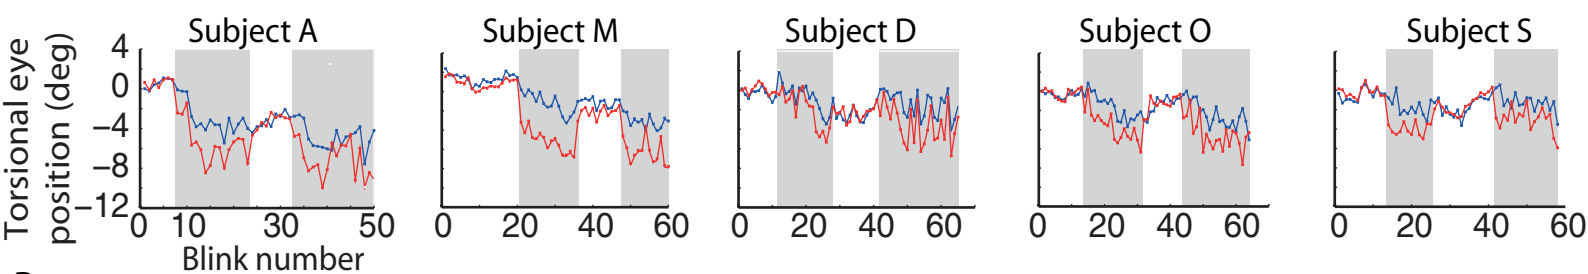

B

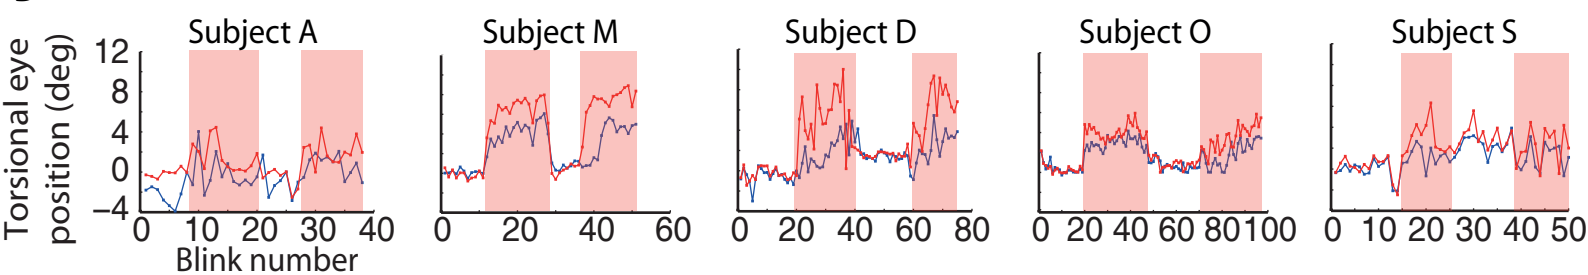

— post-blinking      — pre-blinking      Optic flow CW  
Optic flow CCW

Supplement: supp [file elife-16290-supp-v2.zip]
